# Supplementary material
Source: PubMed Central journal article supplement (PMC1863479)
Supplement: pnas_0702507104_6.pdf [file pnas_0702507104_6.pdf]

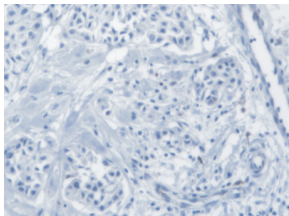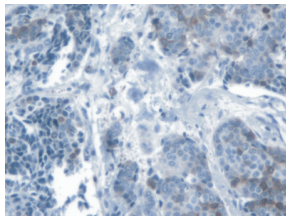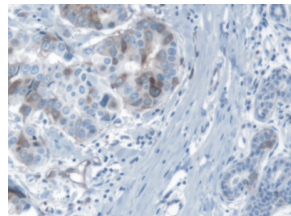

Stathmin IHC score  
PTEN IHC  
*HER2* amplification  
*PIK3CA* Mutation  
Metastasis (year)

0  
Positive  
Negative  
C420R  
None

4  
Positive  
Negative  
None  
None

6  
Positive  
Negative  
E545K  
None

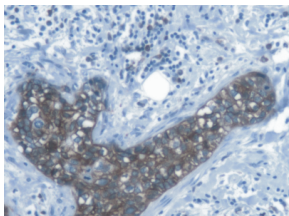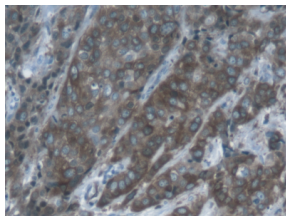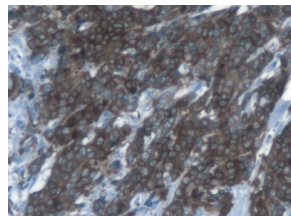

Stathmin IHC score  
PTEN IHC  
*HER2* amplification  
*PIK3CA* Mutation  
Metastasis (year)

11  
Negative  
Negative  
None  
Yes (1.6 years)

12  
Positive  
Positive  
E545K  
Yes (0.1 years)

12  
Negative  
Negative  
None  
Yes (1.2 years)
