# Supplementary material
Source: PubMed Central journal article supplement (PMC1863479)
Supplement: pnas_0702507104_8.pdf [file pnas_0702507104_8.pdf]

**Table 1. Clinical Demographics for 105 Microarray Breast Tumor Set**

|                                | <b>All cases</b> | <b>PTEN IHC-</b> | <b>PTEN IHC+</b> | <b>P-value</b> |
|--------------------------------|------------------|------------------|------------------|----------------|
| N                              | 105              | 35               | 70               |                |
| Estrogen receptor positive     | 45 (43%)         | 13 (37%)         | 32 (46%)         | 0.40           |
| Progesterone receptor positive | 42 (40%)         | 12 (34%)         | 30 (43%)         | 0.40           |
| Lymph node metastasis positive | 65 (62%)         | 19 (54%)         | 46 (66%)         | 0.26           |
| Pre-menopausal                 | 28 (27%)         | 9 (26%)          | 19 (27%)         | 0.88           |
| Median age (range)             | 61 (26-77)       | 60 (42-77)       | 61 (26-75)       | 0.83           |
| Median tumor size, mm (range)  | 27 (2-50)        | 25 (8-50)        | 28 (2-50)        | 0.79           |
| Median followup, years (range) | 6.7 (0.1-12.2)   | 6.3 (1.1-10.9)   | 6.9 (0.1-12.2)   | 0.79           |

Note: For the comparison between PTEN IHC- and PTEN IHC+ groups, the P-values were calculated using Pearson's Chi-squared test for categorical variables and the Mann-Whitney test for continuous variables.
