# Supplementary material
Source: PubMed Central journal article supplement (PMC1863479)
Supplement: pnas_0702507104_9.pdf [file pnas_0702507104_9.pdf]

| Rank | Clone ID     | Accession | Unigene ID (Build 188) | Gene name                                                                            | Symbol   | Sign | Average P-value |
|------|--------------|-----------|------------------------|--------------------------------------------------------------------------------------|----------|------|-----------------|
| 212  | 32781        | R20405    | Hs.558351              | Kinesin heavy chain member 2                                                         | KIF2     | 30   | 0.017254        |
| 213  | 788256       | AA454098  | Hs.270845              | Kinesin family member 23                                                             | KIF23    | 30   | 0.017391        |
| 214  | 824117       | AA490617  | Hs.468623              | Vaccinia related kinase 2                                                            | VRK2     | 30   | 0.017439        |
| 215  | 292882       | N69460    | Hs.9589                | Ubiquilin 1                                                                          | UBQLN1   | 30   | 0.017475        |
| 216  | 44255        | H06113    | Hs.205163              | Mitochondrial ribosomal protein L3                                                   | MRPL3    | 30   | 0.017646        |
| 217  | 2018131      | AI364509  | Hs.505469              | Rac GTPase activating protein 1                                                      | RACGAP1  | 30   | 0.017670        |
| 218  | 788558       | AA452824  | Hs.511265              | Sema domain, transmembrane domain (TM), and cytoplasmic domain, (semaphorin)         | SEMA6D   | -30  | 0.017740        |
| 219  | 2018976      | AI362866  | Hs.350966              | Pituitary tumor-transforming 1                                                       | PTTG1    | 30   | 0.017842        |
| 220  | 712895       | AA282219  | Hs.195080              | Endothelin converting enzyme 1                                                       | ECE1     | -30  | 0.017922        |
| 221  | BC DOX 2 A06 | N/A       | N/A                    | N/A                                                                                  | N/A      | -30  | 0.017960        |
| 222  | 814975       | AA465717  | Hs.314338              | Bromodomain and WD repeat domain containing 1                                        | WDR9     | 30   | 0.017961        |
| 223  | 810844       | AA459164  | Hs.521151              | Zinc finger protein 672                                                              | FLJ22301 | 30   | 0.018020        |
| 224  | BC DOX 5 C02 | N/A       | N/A                    | N/A                                                                                  | N/A      | -30  | 0.018065        |
| 225  | 280375       | N47113    | Hs.370834              | ATPase family, AAA domain containing 2                                               | ATAD2    | 30   | 0.018154        |
| 226  | 2418897      | AI826909  | Hs.226307              | Apolipoprotein B mRNA editing enzyme, catalytic polypeptide-like 3D (putative)       | APOBEC3B | 30   | 0.018301        |
| 227  | 823598       | AA497132  | Hs.4295                | Proteasome (prosome, macropain) 26S subunit, non-ATPase, 12                          | PSMD12   | 30   | 0.018592        |
| 228  | 1476065      | AA873060  | Hs.209983              | Stathmin 1/oncoprotein 18                                                            | STMN1    | 30   | 0.018742        |
| 229  | 262264       | H99426    | Hs.49774               | Protein tyrosine phosphatase, receptor type, M                                       | PTPRM    | -30  | 0.018796        |
| 230  | 309081       | N92895    | Hs.120855              | KIAA0960 protein                                                                     | KIAA0960 | -30  | 0.018935        |
| 231  | 1587847      | AA976533  | Hs.444118              | MCM6 minichromosome maintenance deficient 6 (MIS5 homolog, S. pombe)                 | MCM6     | 30   | 0.018943        |
| 232  | 258966       | N31641    | Hs.510225              | Ribosomal protein S6 kinase, 90kDa, polypeptide 5                                    | RPS6KA5  | -30  | 0.018987        |
| 233  | 1540729      | AA907689  | Hs.507916              | TSC22 domain family, member 1                                                        | TGFB114  | -30  | 0.019080        |
| 234  | 128792       | R16760    | Hs.420229              | Hepatitis B virus x associated protein                                               | HBXAP    | 30   | 0.019190        |
| 235  | 277528       | N34518    | Hs.371886              | CDNA FLJ45534 fis, clone BRTHA2031517                                                | N/A      | -30  | 0.019324        |
| 236  | 435415       | AA700090  | Hs.288224              | Mitochondrial ribosomal protein L50                                                  | MRPL50   | 30   | 0.019341        |
| 237  | 193383       | H48097    | Hs.529609              | ATPase type 13A3                                                                     | ATP13A3  | 30   | 0.019514        |
| 238  | 841398       | AA487544  | Hs.518203              | Poly (ADP-ribose) polymerase family, member 14                                       | PARP14   | 30   | 0.019521        |
| 239  | BC DDP 1 A09 | N/A       | N/A                    | AF141348 alpha-tubulin(cytoskeleton)                                                 | N/A      | 30   | 0.019649        |
| 240  | 399143       | AA774619  | Hs.351099              | Hypothetical protein FLJ10241                                                        | FLJ10241 | -30  | 0.019655        |
| 241  | 309515       | N94385    | Hs.1584                | Cartilage oligomeric matrix protein                                                  | COMP     | -30  | 0.019701        |
| 242  | 753692       | AA406601  | Hs.438236              | Actin binding LIM protein 1                                                          | ABLIM1   | -30  | 0.019756        |
| 243  | 287749       | N79336    | Hs.533573              | CDC7 cell division cycle 7 (S. cerevisiae)                                           | CDC7     | 30   | 0.019780        |
| 244  | 1669563      | AI056710  | Hs.436922              | Ret finger protein 2                                                                 | RFP2     | -30  | 0.019798        |
| 245  | 760299       | AA425947  | Hs.292156              | Dickkopf homolog 3 (Xenopus laevis)                                                  | DKK3     | -30  | 0.019904        |
| 246  | 810974       | AA459407  | Hs.3068                | SWI/SNF related, matrix associated, actin dependent regulator of chromatin, sSMARCA3 | SMARCA3  | 30   | 0.019931        |

Note: 'Clone ID', if numeric, is the IMAGE consortium cDNA clone #, otherwise, it reflects an internally-generated cDNA clone. 'Accession' is the GenBank accession #. 'Sign' represents the sum of signs as described in the methods section. Unavailable data is denoted as 'N/A'. The complete list of all ranked genes is available upon request.
