# Supplementary material
Source: PubMed Central journal article supplement (PMC1863479)
Supplement: pnas_0702507104_10.pdf [file pnas_0702507104_10.pdf]

Table 3. GOMiner Analysis for Genes Overexpressed in PTEN IHC– Tumors

| Rank | GO ID | Total | Under | Over | Change | P-Value (Over) | Term                                                           | Cell Cycle-related | Metabolism-related |
|------|-------|-------|-------|------|--------|----------------|----------------------------------------------------------------|--------------------|--------------------|
| 1    | 6996  | 373   | 11    | 33   | 44     | 0              | organelle organization and biogenesis                          |                    | 1                  |
| 2    | 7017  | 63    | 2     | 12   | 14     | 0              | microtubule-based process                                      |                    |                    |
| 3    | 7049  | 416   | 10    | 49   | 59     | 0              | cell cycle                                                     | 1                  |                    |
| 4    | 74    | 263   | 5     | 27   | 32     | 0              | regulation of cell cycle                                       | 1                  |                    |
| 5    | 7067  | 121   | 2     | 22   | 24     | 0              | mitosis                                                        | 1                  |                    |
| 6    | 87    | 123   | 2     | 22   | 24     | 0              | M phase of mitotic cell cycle                                  | 1                  |                    |
| 7    | 279   | 141   | 2     | 25   | 27     | 0              | M phase                                                        | 1                  |                    |
| 8    | 278   | 169   | 2     | 28   | 30     | 0              | mitotic cell cycle                                             | 1                  |                    |
| 9    | 910   | 112   | 1     | 17   | 18     | 0              | cytokinesis                                                    | 1                  |                    |
| 10   | 51301 | 112   | 1     | 17   | 18     | 0              | cell division                                                  | 1                  |                    |
| 11   | 7018  | 33    | 0     | 10   | 10     | 0              | microtubule-based movement                                     | 1                  |                    |
| 12   | 30705 | 33    | 0     | 10   | 10     | 0              | cytoskeleton-dependent intracellular transport                 | 1                  |                    |
| 13   | 6270  | 12    | 0     | 5    | 5      | 0.0001         | DNA replication initiation                                     | 1                  |                    |
| 14   | 6261  | 45    | 0     | 9    | 9      | 0.0001         | DNA-dependent DNA replication                                  | 1                  |                    |
| 15   | 51329 | 56    | 0     | 10   | 10     | 0.0001         | interphase of mitotic cell cycle                               | 1                  |                    |
| 16   | 51325 | 56    | 0     | 10   | 10     | 0.0001         | interphase                                                     | 1                  |                    |
| 17   | 75    | 28    | 0     | 7    | 7      | 0.0001         | cell cycle checkpoint                                          | 1                  |                    |
| 18   | 16043 | 451   | 12    | 35   | 47     | 0.0003         | cell organization and biogenesis                               |                    | 1                  |
| 19   | 6259  | 311   | 7     | 27   | 34     | 0.0003         | DNA metabolism                                                 |                    | 1                  |
| 20   | 43283 | 804   | 15    | 54   | 69     | 0.0003         | biopolymer metabolism                                          |                    | 1                  |
| 21   | 7093  | 10    | 0     | 4    | 4      | 0.0005         | mitotic checkpoint                                             | 1                  |                    |
| 22   | 7088  | 28    | 0     | 6    | 6      | 0.0009         | regulation of mitosis                                          | 1                  |                    |
| 23   | 6139  | 1408  | 31    | 81   | 112    | 0.0011         | nucleobase, nucleoside, nucleotide and nucleic acid metabolism |                    | 1                  |
| 24   | 6801  | 6     | 0     | 3    | 3      | 0.0014         | superoxide metabolism                                          |                    | 1                  |
| 25   | 7089  | 6     | 0     | 3    | 3      | 0.0014         | traversing start control point of mitotic cell cycle           | 1                  |                    |
| 26   | 86    | 30    | 0     | 6    | 6      | 0.0014         | G2/M transition of mitotic cell cycle                          | 1                  |                    |
| 27   | 8283  | 251   | 7     | 21   | 28     | 0.002          | cell proliferation                                             | 1                  |                    |
| 28   | 50875 | 4227  | 109   | 199  | 308    | 0.0021         | cellular physiological process                                 |                    |                    |
| 29   | 7001  | 125   | 4     | 13   | 17     | 0.0023         | chromosome organization and biogenesis (sensu Eukaryota)       | 1                  |                    |
| 30   | 46112 | 7     | 0     | 3    | 3      | 0.0023         | nucleobase biosynthesis                                        |                    | 1                  |
| 31   | 6468  | 310   | 11    | 24   | 35     | 0.0028         | protein amino acid phosphorylation                             |                    | 1                  |
| 32   | 9987  | 4725  | 123   | 217  | 340    | 0.003          | cellular process                                               |                    |                    |
| 33   | 51258 | 15    | 0     | 4    | 4      | 0.003          | protein polymerization                                         |                    | 1                  |
| 34   | 51276 | 147   | 4     | 14   | 18     | 0.0036         | chromosome organization and biogenesis                         | 1                  |                    |
| 35   | 7059  | 36    | 0     | 6    | 6      | 0.0036         | chromosome segregation                                         | 1                  |                    |
| 36   | 9112  | 8     | 0     | 3    | 3      | 0.0036         | nucleobase metabolism                                          |                    | 1                  |
| 37   | 6333  | 49    | 3     | 7    | 10     | 0.0042         | chromatin assembly or disassembly                              | 1                  |                    |
| 38   | 7010  | 166   | 6     | 15   | 21     | 0.0043         | cytoskeleton organization and biogenesis                       |                    | 1                  |
| 39   | 19058 | 17    | 1     | 4    | 5      | 0.0048         | viral infectious cycle                                         |                    |                    |
| 40   | 6260  | 91    | 1     | 10   | 11     | 0.0049         | DNA replication                                                | 1                  |                    |
| 41   | 70    | 27    | 0     | 5    | 5      | 0.0049         | mitotic sister chromatid segregation                           | 1                  |                    |
| 42   | 8150  | 5172  | 136   | 232  | 368    | 0.005          | biological_process                                             |                    |                    |
| 43   | 16310 | 361   | 11    | 26   | 37     | 0.0051         | phosphorylation                                                |                    | 1                  |
| 44   | 6379  | 3     | 0     | 2    | 2      | 0.0052         | mRNA cleavage                                                  |                    | 1                  |
| 45   | 9113  | 3     | 0     | 2    | 2      | 0.0052         | purine base biosynthesis                                       |                    | 1                  |
| 46   | 819   | 28    | 0     | 5    | 5      | 0.0058         | sister chromatid segregation                                   | 1                  |                    |
| 47   | 6396  | 172   | 2     | 15   | 17     | 0.006          | RNA processing                                                 |                    | 1                  |
| 48   | 46907 | 293   | 5     | 22   | 27     | 0.0061         | intracellular transport                                        |                    |                    |
| 49   | 51244 | 1284  | 32    | 71   | 103    | 0.0069         | regulation of cellular physiological process                   |                    |                    |
| 50   | 6397  | 111   | 1     | 11   | 12     | 0.007          | mRNA processing                                                |                    | 1                  |
| 51   | 6464  | 807   | 27    | 48   | 75     | 0.0079         | protein modification                                           |                    | 1                  |
| 52   | 7582  | 4601  | 117   | 210  | 327    | 0.0096         | physiological process                                          |                    |                    |
| 53   | 67    | 11    | 0     | 3    | 3      | 0.0096         | DNA replication and chromosome cycle                           | 1                  |                    |
| 54   | 7094  | 4     | 0     | 2    | 2      | 0.0101         | mitotic spindle checkpoint                                     | 1                  |                    |
| 55   | 6144  | 4     | 0     | 2    | 2      | 0.0101         | purine base metabolism                                         |                    | 1                  |
| 56   | 16032 | 21    | 1     | 4    | 5      | 0.0106         | viral life cycle                                               |                    |                    |
| 57   | 7046  | 21    | 0     | 4    | 4      | 0.0106         | ribosome biogenesis                                            |                    | 1                  |
| 58   | 44238 | 3044  | 79    | 147  | 226    | 0.0114         | primary metabolism                                             |                    | 1                  |
| 59   | 50794 | 1355  | 34    | 73   | 107    | 0.0115         | regulation of cellular process                                 |                    |                    |
| 60   | 51318 | 12    | 0     | 3    | 3      | 0.0124         | G1 phase                                                       | 1                  |                    |
| 61   | 80    | 12    | 0     | 3    | 3      | 0.0124         | G1 phase of mitotic cell cycle                                 | 1                  |                    |
| 62   | 42254 | 22    | 0     | 4    | 4      | 0.0126         | ribosome biogenesis and assembly                               |                    | 1                  |
| 63   | 16071 | 123   | 1     | 11   | 12     | 0.0147         | mRNA metabolism                                                |                    | 1                  |
| 64   | 6378  | 5     | 0     | 2    | 2      | 0.0164         | mRNA polyadenylation                                           |                    | 1                  |
| 65   | 9067  | 5     | 0     | 2    | 2      | 0.0164         | aspartate family amino acid biosynthesis                       |                    | 1                  |
| 66   | 50791 | 1354  | 35    | 72   | 107    | 0.0165         | regulation of physiological process                            |                    |                    |
| 67   | 79    | 24    | 0     | 4    | 4      | 0.0171         | regulation of cyclin dependent protein kinase activity         | 1                  |                    |
| 68   | 16070 | 214   | 2     | 16   | 18     | 0.0188         | RNA metabolism                                                 |                    | 1                  |
| 69   | 82    | 37    | 0     | 5    | 5      | 0.0188         | G1/S transition of mitotic cell cycle                          | 1                  |                    |
| 70   | 6796  | 443   | 17    | 28   | 45     | 0.0202         | phosphate metabolism                                           |                    | 1                  |
| 71   | 6793  | 443   | 17    | 28   | 45     | 0.0202         | phosphorus metabolism                                          |                    | 1                  |
| 72   | 6041  | 6     | 0     | 2    | 2      | 0.0239         | glucosamine metabolism                                         |                    | 1                  |
| 73   | 6040  | 6     | 0     | 2    | 2      | 0.0239         | amino sugar metabolism                                         |                    | 1                  |
| 74   | 31124 | 6     | 0     | 2    | 2      | 0.0239         | mRNA 3'-end processing                                         |                    | 1                  |
| 75   | 31123 | 6     | 0     | 2    | 2      | 0.0239         | RNA 3'-end processing                                          |                    | 1                  |
| 76   | 50789 | 1474  | 38    | 76   | 114    | 0.0273         | regulation of biological process                               |                    |                    |
| 77   | 6334  | 28    | 1     | 4    | 5      | 0.0289         | nucleosome assembly                                            | 1                  |                    |
| 78   | 42127 | 120   | 2     | 10   | 12     | 0.0302         | regulation of cell proliferation                               | 1                  |                    |
| 79   | 6325  | 104   | 4     | 9    | 13     | 0.0314         | establishment and/or maintenance of chromatin architecture     | 1                  |                    |
| 80   | 50792 | 7     | 1     | 2    | 3      | 0.0326         | regulation of viral life cycle                                 |                    |                    |
| 81   | 6800  | 31    | 2     | 4    | 6      | 0.0403         | oxygen and reactive oxygen species metabolism                  |                    | 1                  |
| 82   | 7028  | 31    | 0     | 4    | 4      | 0.0403         | cytoplasm organization and biogenesis                          |                    | 1                  |
| 83   | 6323  | 109   | 4     | 9    | 13     | 0.0407         | DNA packaging                                                  | 1                  |                    |

| Rank | GO ID | Total | Under | Over | Change | P-Value (Over) | Term                                                 | Cell Cycle-related | Metabolism-related |
|------|-------|-------|-------|------|--------|----------------|------------------------------------------------------|--------------------|--------------------|
| 84   | 46049 | 1     | 0     | 1    | 1      | 0.0424         | UMP metabolism                                       |                    | 1                  |
| 85   | 7130  | 1     | 0     | 1    | 1      | 0.0424         | synaptonemal complex formation                       | 1                  |                    |
| 86   | 7129  | 1     | 0     | 1    | 1      | 0.0424         | synapsis                                             | 1                  |                    |
| 87   | 7128  | 1     | 0     | 1    | 1      | 0.0424         | meiotic prophase I                                   | 1                  |                    |
| 88   | 7095  | 1     | 0     | 1    | 1      | 0.0424         | mitotic G2 checkpoint                                | 1                  |                    |
| 89   | 7079  | 1     | 0     | 1    | 1      | 0.0424         | mitotic chromosome movement towards spindle pole     | 1                  |                    |
| 90   | 6597  | 1     | 0     | 1    | 1      | 0.0424         | spermine biosynthesis                                |                    | 1                  |
| 91   | 6547  | 1     | 0     | 1    | 1      | 0.0424         | histidine metabolism                                 |                    | 1                  |
| 92   | 45071 | 1     | 0     | 1    | 1      | 0.0424         | negative regulation of viral genome replication      |                    |                    |
| 93   | 6222  | 1     | 0     | 1    | 1      | 0.0424         | UMP biosynthesis                                     |                    | 1                  |
| 94   | 1315  | 1     | 0     | 1    | 1      | 0.0424         | age-dependent response to reactive oxygen species    |                    |                    |
| 95   | 6048  | 1     | 0     | 1    | 1      | 0.0424         | UDP-N-acetylglucosamine biosynthesis                 |                    | 1                  |
| 96   | 6045  | 1     | 0     | 1    | 1      | 0.0424         | N-acetylglucosamine biosynthesis                     |                    | 1                  |
| 97   | 6042  | 1     | 0     | 1    | 1      | 0.0424         | glucosamine biosynthesis                             |                    | 1                  |
| 98   | 51324 | 1     | 0     | 1    | 1      | 0.0424         | prophase                                             | 1                  |                    |
| 99   | 51305 | 1     | 0     | 1    | 1      | 0.0424         | chromosome movement towards spindle pole             | 1                  |                    |
| 100  | 48525 | 1     | 0     | 1    | 1      | 0.0424         | negative regulation of viral life cycle              |                    |                    |
| 101  | 305   | 1     | 0     | 1    | 1      | 0.0424         | response to oxygen radicals                          |                    |                    |
| 102  | 303   | 1     | 0     | 1    | 1      | 0.0424         | response to superoxide                               |                    |                    |
| 103  | 17121 | 1     | 0     | 1    | 1      | 0.0424         | phospholipid scrambling                              |                    |                    |
| 104  | 50434 | 1     | 0     | 1    | 1      | 0.0424         | positive regulation of viral transcription           |                    |                    |
| 105  | 30838 | 1     | 0     | 1    | 1      | 0.0424         | positive regulation of actin filament polymerization |                    | 1                  |
| 106  | 105   | 1     | 0     | 1    | 1      | 0.0424         | histidine biosynthesis                               |                    | 1                  |
| 107  | 9301  | 1     | 0     | 1    | 1      | 0.0424         | snRNA transcription                                  |                    | 1                  |
| 108  | 72    | 1     | 0     | 1    | 1      | 0.0424         | M phase specific microtubule process                 | 1                  |                    |
| 109  | 9174  | 1     | 0     | 1    | 1      | 0.0424         | pyrimidine ribonucleoside monophosphate biosynthesis |                    | 1                  |
| 110  | 9173  | 1     | 0     | 1    | 1      | 0.0424         | pyrimidine ribonucleoside monophosphate metabolism   |                    | 1                  |
| 111  | 9089  | 1     | 0     | 1    | 1      | 0.0424         | lysine biosynthesis via diaminopimelate              |                    | 1                  |
| 112  | 9085  | 1     | 0     | 1    | 1      | 0.0424         | lysine biosynthesis                                  |                    | 1                  |
| 113  | 9076  | 1     | 0     | 1    | 1      | 0.0424         | histidine family amino acid biosynthesis             |                    | 1                  |
| 114  | 9075  | 1     | 0     | 1    | 1      | 0.0424         | histidine family amino acid metabolism               |                    | 1                  |
| 115  | 15680 | 1     | 0     | 1    | 1      | 0.0424         | intracellular copper ion transport                   |                    |                    |
| 116  | 19877 | 1     | 0     | 1    | 1      | 0.0424         | diaminopimelate biosynthesis                         |                    | 1                  |
| 117  | 8215  | 1     | 0     | 1    | 1      | 0.0424         | spermine metabolism                                  |                    | 1                  |
| 118  | 46451 | 1     | 0     | 1    | 1      | 0.0424         | diaminopimelate metabolism                           |                    | 1                  |
| 119  | 46349 | 1     | 0     | 1    | 1      | 0.0424         | amino sugar biosynthesis                             |                    | 1                  |
| 120  | 8054  | 1     | 0     | 1    | 1      | 0.0424         | cyclin catabolism                                    | 1                  |                    |
| 121  | 45869 | 1     | 0     | 1    | 1      | 0.0424         | negative regulation of retroviral genome replication |                    |                    |
| 122  | 44237 | 3133  | 80    | 146  | 226    | 0.0485         | cellular metabolism                                  |                    | 1                  |

Note: Gene Ontology (GO) analysis was performed using the top 785 signature genes with APV<0.05. Only 'biological process' GO categories overrepresented as upregulated in PTEN IHC- tumors and with  $P < 0.05$  are shown. 'Total' = total # of genes annotated to the given category; 'Under' = # of these genes underexpressed in PTEN IHC- group; 'Over' = # of genes overexpressed in PTEN IHC- group; 'Changed' = total # of genes that are under- or overexpressed. Cell cycle and metabolism-related categories were identified manually.
