# Supplementary material
Source: PubMed Central journal article supplement (PMC1863479)
Supplement: pnas_0702507104_11.pdf [file pnas_0702507104_11.pdf]

**Table 4. GOMiner Analysis for Genes Overexpressed in PTEN IHC+ Tumors**

| Rank | GO ID | Total | Under | Over | Change | P-Value (Over) | Term                                                             | Muscle-related | MAPK-related |
|------|-------|-------|-------|------|--------|----------------|------------------------------------------------------------------|----------------|--------------|
| 1    | 165   | 51    | 0     | 7    | 7      | 0.0003         | MAPKKK cascade                                                   |                | 1            |
| 2    | 6940  | 2     | 0     | 2    | 2      | 0.0007         | regulation of smooth muscle contraction                          | 1              |              |
| 3    | 6937  | 9     | 0     | 3    | 3      | 0.0012         | regulation of muscle contraction                                 | 1              |              |
| 4    | 6939  | 12    | 0     | 3    | 3      | 0.003          | smooth muscle contraction                                        | 1              |              |
| 5    | 188   | 13    | 0     | 3    | 3      | 0.0039         | inactivation of MAPK                                             |                | 1            |
| 6    | 7243  | 147   | 5     | 10   | 15     | 0.0042         | protein kinase cascade                                           |                |              |
| 7    | 7154  | 1346  | 44    | 48   | 92     | 0.0064         | cell communication                                               |                |              |
| 8    | 6936  | 49    | 0     | 5    | 5      | 0.0079         | muscle contraction                                               | 1              |              |
| 9    | 7165  | 1093  | 38    | 40   | 78     | 0.0091         | signal transduction                                              |                |              |
| 10   | 7167  | 101   | 4     | 7    | 11     | 0.0145         | enzyme linked receptor protein signaling pathway                 |                |              |
| 11   | 9190  | 9     | 0     | 2    | 2      | 0.0208         | cyclic nucleotide biosynthesis                                   |                |              |
| 12   | 7254  | 24    | 0     | 3    | 3      | 0.0224         | JNK cascade                                                      |                | 1            |
| 13   | 31098 | 24    | 0     | 3    | 3      | 0.0224         | stress-activated protein kinase signaling pathway                |                |              |
| 14   | 6960  | 1     | 0     | 1    | 1      | 0.0256         | antimicrobial humoral response (sensu Protostomia)               |                |              |
| 15   | 6911  | 1     | 0     | 1    | 1      | 0.0256         | phagocytosis, engulfment                                         |                |              |
| 16   | 6909  | 10    | 0     | 2    | 2      | 0.0256         | phagocytosis                                                     |                |              |
| 17   | 6651  | 1     | 0     | 1    | 1      | 0.0256         | diacylglycerol biosynthesis                                      |                |              |
| 18   | 6627  | 1     | 0     | 1    | 1      | 0.0256         | mitochondrial protein processing                                 |                |              |
| 19   | 6610  | 1     | 0     | 1    | 1      | 0.0256         | ribosomal protein-nucleus import                                 |                |              |
| 20   | 6581  | 1     | 0     | 1    | 1      | 0.0256         | acetylcholine catabolism                                         |                |              |
| 21   | 6573  | 1     | 0     | 1    | 1      | 0.0256         | valine metabolism                                                |                |              |
| 22   | 1507  | 1     | 0     | 1    | 1      | 0.0256         | acetylcholine catabolism in synaptic cleft                       |                |              |
| 23   | 51294 | 1     | 0     | 1    | 1      | 0.0256         | establishment of spindle orientation                             |                |              |
| 24   | 16572 | 1     | 0     | 1    | 1      | 0.0256         | histone phosphorylation                                          |                |              |
| 25   | 132   | 1     | 0     | 1    | 1      | 0.0256         | establishment of mitotic spindle orientation                     |                |              |
| 26   | 48016 | 1     | 0     | 1    | 1      | 0.0256         | inositol phosphate-mediated signaling                            |                |              |
| 27   | 16065 | 1     | 0     | 1    | 1      | 0.0256         | humoral defense mechanism (sensu Protostomia)                    |                |              |
| 28   | 8291  | 1     | 0     | 1    | 1      | 0.0256         | acetylcholine metabolism                                         |                |              |
| 29   | 45947 | 1     | 0     | 1    | 1      | 0.0256         | negative regulation of translational initiation                  |                |              |
| 30   | 9653  | 499   | 11    | 20   | 31     | 0.0285         | morphogenesis                                                    |                |              |
| 31   | 6897  | 68    | 0     | 5    | 5      | 0.0294         | endocytosis                                                      |                |              |
| 32   | 9310  | 27    | 0     | 3    | 3      | 0.0306         | amine catabolism                                                 |                |              |
| 33   | 7205  | 11    | 0     | 2    | 2      | 0.0307         | protein kinase C activation                                      |                | 1            |
| 34   | 1503  | 11    | 0     | 2    | 2      | 0.0307         | ossification                                                     |                |              |
| 35   | 31214 | 11    | 0     | 2    | 2      | 0.0307         | biomineral formation                                             |                |              |
| 36   | 7169  | 69    | 3     | 5    | 8      | 0.0311         | transmembrane receptor protein tyrosine kinase signaling pathway |                |              |
| 37   | 9887  | 383   | 9     | 16   | 25     | 0.0348         | organogenesis                                                    |                |              |
| 38   | 48513 | 383   | 9     | 16   | 25     | 0.0348         | organ development                                                |                |              |
| 39   | 7173  | 12    | 0     | 2    | 2      | 0.0363         | epidermal growth factor receptor signaling pathway               |                |              |
| 40   | 46849 | 12    | 0     | 2    | 2      | 0.0363         | bone remodeling                                                  |                |              |
| 41   | 44267 | 1414  | 71    | 46   | 117    | 0.0384         | cellular protein metabolism                                      |                |              |
| 42   | 7166  | 390   | 14    | 16   | 30     | 0.0401         | cell surface receptor linked signal transduction                 |                |              |
| 43   | 7275  | 719   | 20    | 26   | 46     | 0.0413         | development                                                      |                |              |
| 44   | 6470  | 75    | 2     | 5    | 7      | 0.0423         | protein amino acid dephosphorylation                             |                |              |
| 45   | 19538 | 1424  | 71    | 46   | 117    | 0.0428         | protein metabolism                                               |                |              |
| 46   | 16311 | 76    | 2     | 5    | 7      | 0.0444         | dephosphorylation                                                |                |              |

Note: Gene Ontology (GO) analysis was performed using the top 785 signature genes with APV<0.05. Only 'biological process' GO categories overrepresented as upregulated in PTEN IHC+ tumors and with  $P < 0.05$  are shown. 'Total' = total # of genes annotated to the given category; 'Under' = # of these genes underexpressed in PTEN IHC+ group; 'Over' = # of genes overexpressed in PTEN IHC+ group; 'Changed' = total # of genes that are under- or overexpressed. Muscle and MAPK pathway-related categories were identified manually.
