# Supplementary material
Source: PubMed Central journal article supplement (PMC1863479)
Supplement: pnas_0702507104_12.pdf [file pnas_0702507104_12.pdf]

| Tumor (cases)        | Dataset (# genes)   | Outcome Variable | Binary Marker        | HR   | 95% CI       | P-value  | Continuous Marker   | HR   | 95% CI       | P-value  |
|----------------------|---------------------|------------------|----------------------|------|--------------|----------|---------------------|------|--------------|----------|
| Breast (295)         | van de Vijver (173) | OS               | Sig. P vs A          | 3.69 | 2.25 to 6.06 | 2.21E-07 | Signature Score     | 2.33 | 1.74 to 3.14 | 1.98E-08 |
|                      |                     | DDFS             | Sig. P vs A          | 2.48 | 1.65 to 3.73 | 1.15E-05 | Signature Score     | 1.80 | 1.40 to 2.32 | 4.10E-06 |
|                      |                     | OS (5-year)      | Sig. P vs A          | 4.13 | 2.11 to 8.10 | 3.63E-05 |                     |      |              |          |
|                      |                     | DDFS (5-year)    | Sig. P vs A          | 3.06 | 1.89 to 4.95 | 5.19E-06 |                     |      |              |          |
| Breast (99)          | Sotiriou (92)       | BCS              | Sig. P vs A          | 1.87 | 0.95 to 3.68 | 0.069    | Signature Score     | 2.33 | 1.14 to 4.74 | 0.020    |
|                      |                     | RFS              | Sig. P vs A          | 1.89 | 1.02 to 3.48 | 0.042    | Signature Score     | 2.13 | 1.14 to 3.99 | 0.018    |
|                      |                     | BCS (5-year)     | Sig. P vs A          | 2.70 | 1.13 to 6.42 | 0.025    |                     |      |              |          |
|                      |                     | RFS (5-year)     | Sig. P vs A          | 1.95 | 0.99 to 3.83 | 0.053    |                     |      |              |          |
| Prostate (79)        | Glinsky (152)       | DDFS             | Sig. P vs A          | 2.27 | 1.17 to 4.39 | 0.015    | Signature Score     | 2.87 | 1.13 to 7.32 | 0.027    |
|                      |                     | DDFS (5-year)    | Sig. P vs A          | 2.01 | 1.00 to 4.04 | 0.051    |                     |      |              |          |
| Bladder (80)<br>(32) | Blaveri (115)       | OS               | Sig. P vs A          | 1.38 | 0.76 to 2.49 | 0.292    | Signature Score     | 1.87 | 1.01 to 3.48 | 0.047    |
|                      |                     | OS               | Sig. P vs A "robust" | 3.89 | 1.29 to 11.7 | 0.016    |                     |      |              |          |
|                      |                     | OS (5-year*)     | Sig. P vs A "robust" | 3.89 | 1.29 to 11.7 | 0.016    |                     |      |              |          |
| Lung (86)            | Beer (79)           | OS               | Sig. P vs A          | 2.00 | 0.85 to 4.7  | 0.112    | Signature Score     | 1.56 | 0.82 to 2.95 | 0.176    |
|                      |                     | OS (5-year)      | Sig. P vs A          | 2.31 | 0.94 to 5.66 | 0.068    |                     |      |              |          |
| Breast (191)         | this study (1)      | DDFS             | Stathmin IHC + vs -  | 1.85 | 0.93 to 3.68 | 0.081    | Stathmin Continuous | 1.05 | 0.98 to 1.12 | 0.183    |
|                      |                     | DDFS (5-year)    | Stathmin IHC + vs -  | 2.38 | 1.17 to 4.84 | 0.016    | Stathmin Continuous | 1.08 | 1.01 to 1.16 | 0.036    |
|                      |                     | DDFS (2-year)    | Stathmin IHC + vs -  | 4.09 | 1.72 to 9.76 | 0.001    | Stathmin Continuous | 1.16 | 1.05 to 1.29 | 0.004    |

Markers are as follows: PTEN-loss signature Present vs. Absent (Sig. P vs A), PTEN-loss signature correlation as a continuous variable (Signature Score), stathmin immunohistochemistry dichotomized high vs. low (Stathmin IHC + vs -), stathmin IHC score as a continuous variable (Stathmin Score). Outcome variables (overall survival, OS; distant disease-free survival, DDFS; breast cancer-specific survival, BCS; recurrence-free survival, RFS) are analyzed over the complete follow-up period (see Fig. 2) unless otherwise noted in parentheses. The number of mapped signature genes to each platform are indicated in parenthesis after the Dataset. "Robust" classifications have correlations >0.2 to either Signature Present or Absent centroids and the number of cases above this threshold is indicated under the Tumor column. Computed hazard ratios (HR), 95% confidence intervals (95% CI), and P-values are shown. Note, the proportional hazards assumption was not met for the 5-year and complete follow-up analyses of DDFS for the analyses by high and low stathmin IHC. \* "Robust" OS analysis over the complete and 5-year follow-up periods for the Blaveri bladder cancer dataset yielded the exact same result.
