# Supplementary material
Source: PubMed Central journal article supplement (PMC1863479)
Supplement: pnas_0702507104_13.pdf [file pnas_0702507104_13.pdf]

**Table 6. Multivariate Cox regression analysis: PTEN signature and stathmin IHC in breast cancer**

| Tumor (cases) | Dataset (# genes)   | Outcome Variable | Marker              | HR   | 95% CI        | <i>P</i> -value |
|---------------|---------------------|------------------|---------------------|------|---------------|-----------------|
| Breast (295)  | van de Vijver (173) | OS               | Sig. P vs A         | 2.88 | 1.68 to 4.94  | 1.16E-04        |
|               |                     |                  | ER + vs -           | 0.48 | 0.29 to 0.78  | 0.003           |
|               |                     |                  | Node + vs -         | 1.15 | 0.73 to 1.80  | 0.551           |
|               |                     | DDFS             | Sig. P vs A         | 2.30 | 1.48 to 3.59  | 2.47E-04        |
|               |                     |                  | ER + vs -           | 0.77 | 0.48 to 1.22  | 0.266           |
|               |                     |                  | Node + vs -         | 1.18 | 0.79 to 1.75  | 0.407           |
| Breast (191)  | this study (1)      | DDFS (2-year)    | Stathmin IHC + vs - | 3.54 | 1.23 to 10.18 | 0.019           |
|               |                     |                  | ER + vs -           | 0.49 | 0.18 to 1.32  | 0.159           |
|               |                     |                  | Node + vs -         | 2.08 | 0.81 to 5.34  | 0.129           |
|               |                     | DDFS (5-year)    | Stathmin IHC + vs - | 2.45 | 1.06 to 5.63  | 0.035           |
|               |                     |                  | ER + vs -           | 0.56 | 0.29 to 1.10  | 0.094           |
|               |                     |                  | Node + vs -         | 2.54 | 1.24 to 5.23  | 0.011           |
|               |                     | DDFS             | Stathmin IHC + vs - | 2.11 | 0.94 to 4.73  | 0.071           |
|               |                     |                  | ER + vs -           | 0.75 | 0.40 to 1.39  | 0.358           |
|               |                     |                  | Node + vs -         | 2.56 | 1.34 to 4.91  | 0.004           |

Markers are as follows: PTEN-loss Signature Present vs. Absent (Sig. P vs A), estrogen receptor positive vs. negative (ER + vs -), lymph node metastasis positive vs. negative (Node + vs -), and stathmin high vs. low (Stathmin IHC + vs -). Outcome variables (overall survival, OS; distant disease-free survival, DDFS) are analyzed over the complete follow-up period unless otherwise noted in parentheses. Computed hazard ratios (HR), 95% confidence intervals (95% CI), and *P*-values are shown.
