# Supplementary material
Source: PubMed Central journal article supplement (PMC1863479)
Supplement: pnas_0702507104_14.pdf [file pnas_0702507104_14.pdf]

**Table 7. Associations of PTEN, ATAD1, and Stathmin mRNA Levels in Independent Datasets**

| Dataset       | Carcinoma Type | Number of Samples in Dataset | PTEN levels by signature classification | PTEN levels to signature score, Pearson r, P-value | ATAD1 levels by signature classification | ATAD1 levels to signature score | Stathmin levels by signature classification | Stathmin levels to signature score |
|---------------|----------------|------------------------------|-----------------------------------------|----------------------------------------------------|------------------------------------------|---------------------------------|---------------------------------------------|------------------------------------|
| van de Vijver | Breast         | 295                          | P=0.0004 (N=295)                        | r=-0.289, P<0.0001 (N=295)                         | NS (N=292)                               | NS (N=292)                      | P<0.0001 (N=295)                            | r=0.690, P<0.0001                  |
| Sotiriou      | Breast         | 99                           | NS (N=96)                               | NS (N=96)                                          | P=0.0336 (N=99)                          | r=-0.183, P=0.0696 (N=99)       | NP                                          | NP                                 |
| Beer          | Lung           | 86                           | NS (N=86)                               | NS (N=86)                                          | NP                                       | NP                              | NP                                          | NP                                 |
| Blaveri       | Bladder        | 80                           | NS (N=71)                               | NS (N=71)                                          | NS (N=65)                                | NS (N=65)                       | NP                                          | NP                                 |
| Glinsky       | Prostate       | 79                           | NS (N=79)                               | r=-0.194, P=0.0869 (N=79)                          | NP                                       | NP                              | P=0.0511 (N=79)                             | r=0.273, P=0.0151 (N=79)           |

Note: The gene expression levels of each gene were tested whether they were significantly lower (PTEN and ATAD1) or higher (Stathmin) in the classified Signature Present group compared to the Signature Absent group using the Mann-Whitney test. The association of the gene expression levels to the PTEN signature score was ascertained using Pearson's correlation coefficient. The number of datapoints available for each test is given within parentheses. Tests with P-values above 0.10 are reported as not significant (NS). When a given gene was not present in the dataset, it is designated NP.
