# Supplementary material
Source: PubMed Central journal article supplement (PMC1863479)
Supplement: pnas_0702507104_15.pdf [file pnas_0702507104_15.pdf]

**Table 8. Clinical Demographics for Stathmin IHC Breast Tumor Set**

|                                | <b>All cases</b> | <b>With PTEN IHC data</b> | <b>P-value</b> |
|--------------------------------|------------------|---------------------------|----------------|
| N                              | 191              | 181                       |                |
| Estrogen receptor positive     | 126 (66%)        | 119 (66%)                 | 0.96           |
| Progesterone receptor positive | 96 (50%)         | 92 (51%)                  | 0.91           |
| Lymph node metastasis positive | 118 (62%)        | 113 (62%)                 | 0.90           |
| Pre-menopausal                 | 36 (19%)         | 35 (19%)                  | 0.90           |
| Median age (range)             | 64 (26-77)       | 64 (26-77)                | 0.89           |
| Median tumor size, mm (range)  | 25 (2-55)        | 25 (2-55)                 | 0.91           |
| Median followup, years (range) | 6.7 (0.3-13.2)   | 6.8 (0.3-13.2)            | 0.95           |

Note: P-values are calculated using Pearson's Chi-squared test for categorical variables and the Mann-Whitney test for continuous variables.
