# Supplementary material
Source: PubMed Central journal article supplement (PMC1863479)

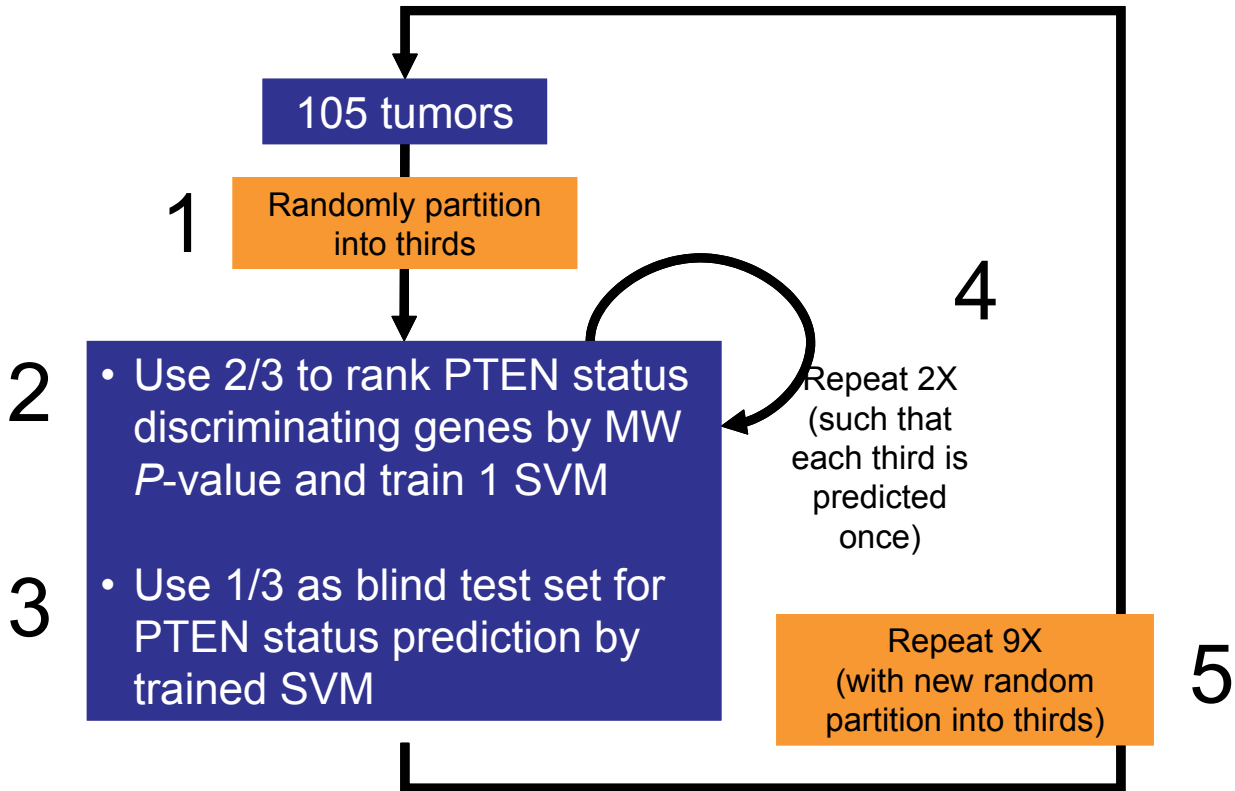

Thus, in total there are 30 MW-ranked gene lists, 30 SVMs trained and each tumor is classified by 10 SVMs

Supplement: pnas_0702507104_1.pdf [file pnas_0702507104_1.pdf]

**A**

Chromosome 10q23.31

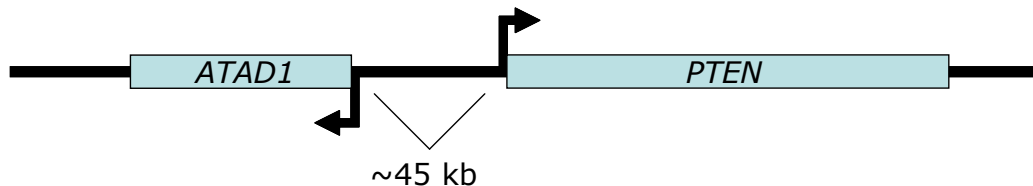**B**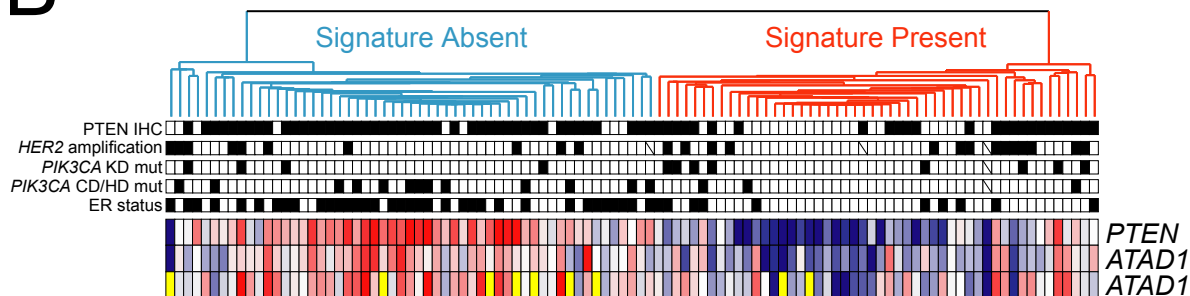**C**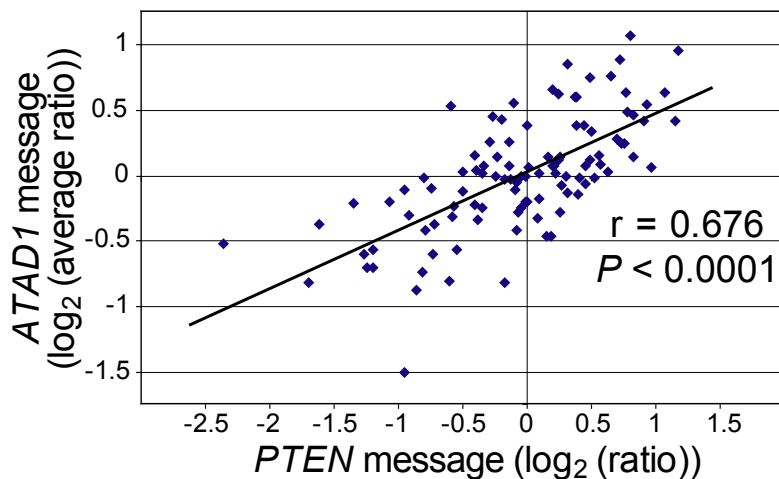

Supplement: pnas_0702507104_2.pdf [file pnas_0702507104_2.pdf]

# *PIK3CA* mutation

Helical

---

Kinase

---

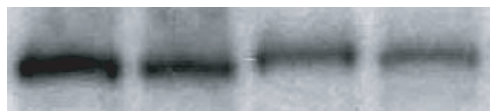

p110 $\alpha$

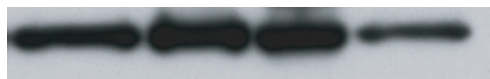

PTEN

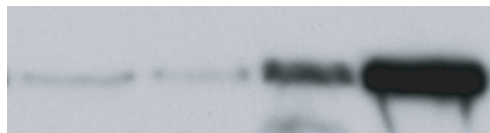

p-Akt (S473)

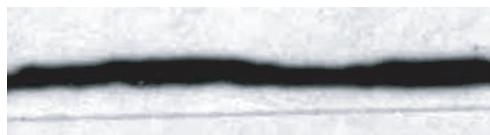

$\beta$ -tubulin

Supplement: pnas_0702507104_3.pdf [file pnas_0702507104_3.pdf]

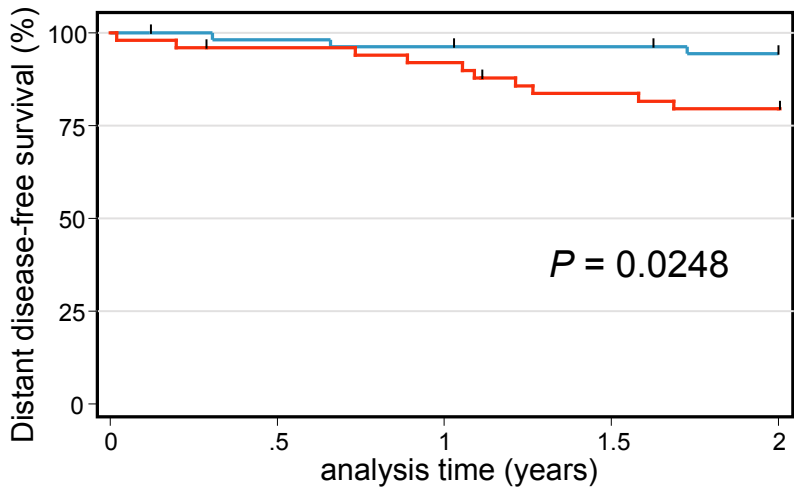

Supplement: pnas_0702507104_4.pdf [file pnas_0702507104_4.pdf]

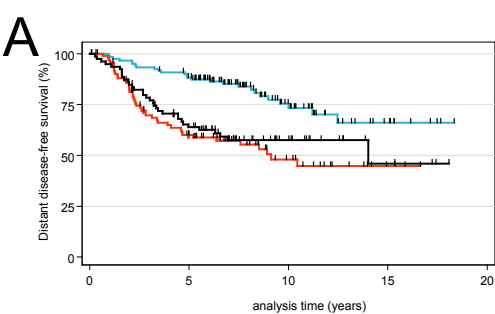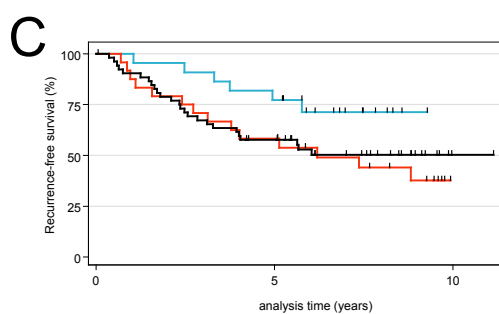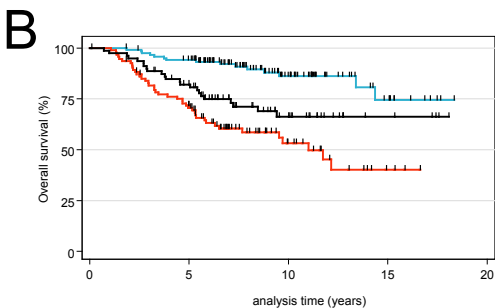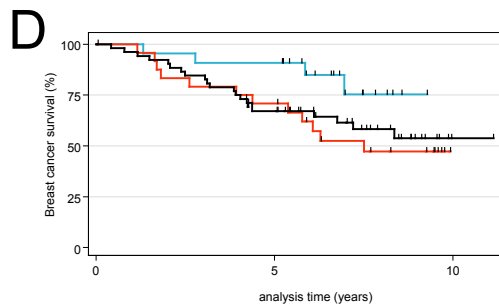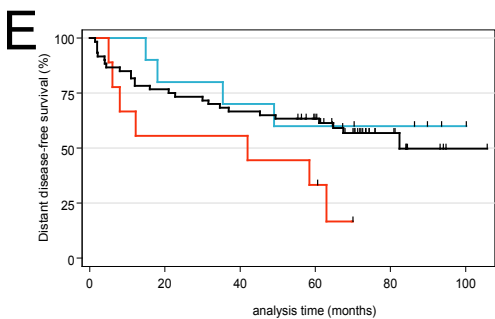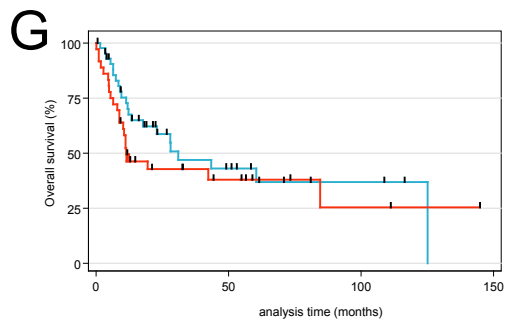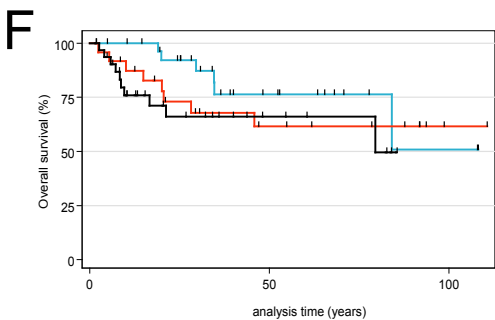

— Signature Present

— Signature Absent

— Not Classified

Supplement: pnas_0702507104_5.pdf [file pnas_0702507104_5.pdf]

**A**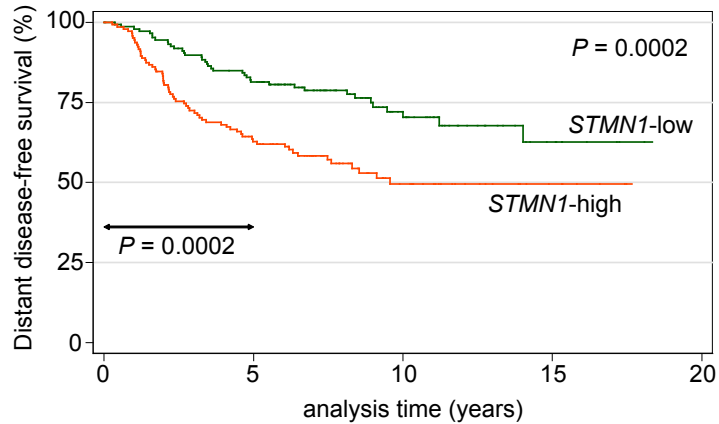**B**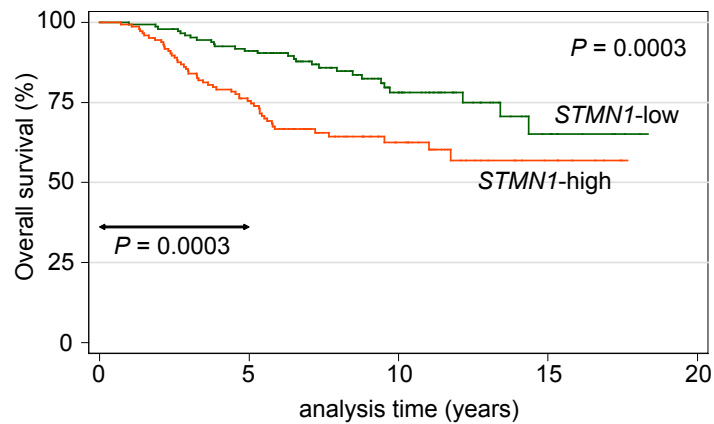**C**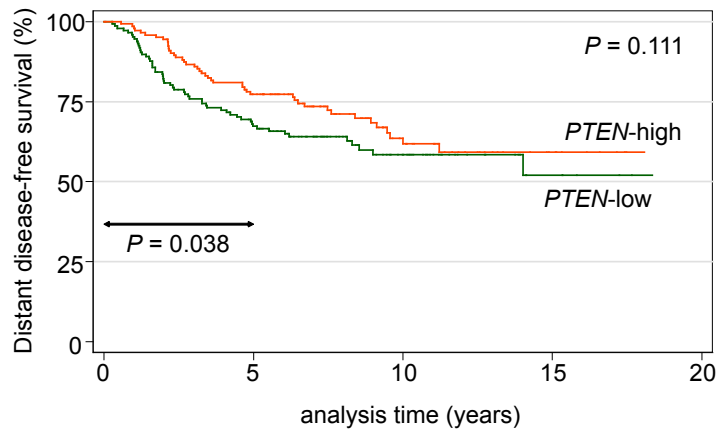**D**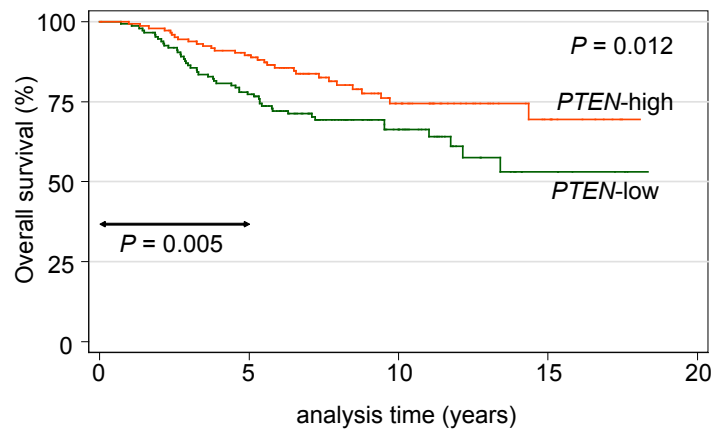

Supplement: pnas_0702507104_7.pdf [file pnas_0702507104_7.pdf]
